# Supplementary material
Source: Elsevier journal article supplement (https://www.sciencedirect.com/science/article/pii/S0213005X13000554)
Supplement: mmc1 [file S0213005X13000554:mmc1.pdf]

## VARIABLES EXTRAÍDAS SIN VARIACIONES DE LOS ESTÁNDARES DE CALIDAD DEL PACIENTE ADULTO<sup>8</sup>

### **Condiciones estructurales**

**1- Atención por médico especializado:** La complejidad creciente del tratamiento antirretroviral (TARV) implica que el cuidado de los pacientes debe efectuarse por personal especializado que tenga los conocimientos adecuados (Nivel B). La ausencia en nuestro país de una formación reglada en enfermedades infecciosas, también en pediatría, dificulta definir el grado de capacitación necesario. De todos modos, la Sociedad Española de Infectología Pediátrica (SEIP) define la formación necesaria para subespecializarse en este sentido y trabaja, junto al resto de subespecialidades de la Asociación Española de Pediatría (AEP), en pro de su reconocimiento oficial (<http://www.aeped.es/noticias/presentacion-libro-blanco-las-especialidades-pediatricas>).

Explicación de términos. Médico especializado: formación vía MIR, con ejercicio profesional continuado durante los últimos 3 años en una unidad de enfermedades infecciosas que atienda al menos a 25 pacientes/año por profesional.

**2-Disponibilidad de recursos diagnósticos:** El recuento de los linfocitos T CD4+ y la carga viral (CV) son los más potentes predictores independientes de progresión y de respuesta al TARV, y por ello se deberían monitorizar periódicamente (Nivel B)<sup>9</sup>.

Asimismo, es preciso tener la posibilidad de realizar pruebas genotípicas de resistencias ya que según las recomendaciones de CEVIHP/SEIP/AEP/PNS se deben realizar en pacientes que vayan a iniciar TARV (Nivel A), en los recién nacidos con infección VIH cuyas madres recibieron antirretrovirales, y en todos los casos de fracaso del tratamiento (Nivel B)<sup>9</sup>. Por tanto, todos los centros donde se realice el seguimiento de pacientes VIH/SIDA deben contar con estos recursos.

Explicación de términos. Recursos diagnósticos básicos: disponibilidad en el propio centro o en el laboratorio de referencia de determinación de CV con límite de detección en 50 copias/ml o menos, cuantificación de linfocito T CD4+ mediante citometría de flujo y estudio genotípico de resistencias.

**3-Farmacia externa para la dispensación de fármacos:** Los fármacos antirretrovirales en España se dispensan en los centros hospitalarios. Además, son tratamientos crónicos que requieren una dispensación continuada para conseguir una adherencia óptima. Se requiere un espacio con buena accesibilidad, que permita la confidencialidad y con un horario amplio que facilite la correcta información y dispensación de los fármacos (Nivel C).

Explicación de términos. Farmacia externa: existencia de un espacio de dispensación de fármacos de uso hospitalario, por el servicio de farmacia, para pacientes no hospitalizados o externos. Debe incluir todos los siguientes: espacio para la dispensación individualizada de TARV, validación de la dispensación por parte de un farmacéutico, horario de dispensación que cubra como mínimo las horas de consultas y una tarde a la semana, y existencia de información verbal y escrita sobre el tratamiento. La posibilidad de información

verbal se evaluará según las condiciones de confidencialidad del espacio y la información escrita se evaluará mediante la existencia de folletos informativos.

**4-Condiciones de intimidad y confidencialidad estructural:** Se debe mantener un espacio acorde tanto para el niño y adolescente, así como para el familiar y/o tutor acompañante (consultorio adaptado al niño y adolescente, puertas que no permitan acceso de terceros, aislamiento auditivo). Es en la consulta médica cuando se debe dialogar con el paciente acerca de sus hábitos, adherencia al tratamiento, etc., por lo que debe reunir todas las condiciones para asegurar este vínculo médico-paciente (Nivel C).

Explicación de términos. Consulta: espacio donde se realizan habitualmente las visitas y seguimiento de las personas con VIH y otras infecciones. Condiciones de confidencialidad e intimidad: aislamiento auditivo (p. ej., que haya paredes hasta el techo para separar de las demás estancias), puerta que no permita la entrada directa de personas ajenas a la consulta (es decir, antesala o sistema de cierre), y en caso de haber camilla en la sala, que sea posible explorar al paciente en condiciones de intimidad (p. ej., que haya cortina como barrera visual).

### **Diagnóstico y evaluación inicial**

**5-Tiempo transcurrido entre el diagnóstico de infección por VIH y primer control en atención especializada (AE):** Es imprescindible la interrelación entre la AE y la atención primaria (AP) tanto para la derivación oportuna, como para el seguimiento del niño y/o adolescente VIH. Según las recomendaciones de expertos de GESIDA la demora entre el diagnóstico y la primera consulta especializada no debe superar los 30 días (Nivel C).

Explicación de términos. Intervalo de 30 días: días naturales transcurridos desde fecha de emisión del diagnóstico serológico solicitado por AP, y la primera visita realizada en la unidad de VIH.

**6-Diagnóstico tardío de la infección VIH en AE:** El diagnóstico tardío de la infección por el VIH implica un riesgo elevado de complicaciones graves, con una mortalidad 5 veces mayor. Según la bibliografía, hasta un 40% de los pacientes adultos con infección por el VIH que acude por primera vez a los servicios sanitarios especializados presenta inmunodepresión avanzada ( $<200$  linfocitos T CD4 $^{+}$ /mm $^3$ ) o criterios de SIDA (Nivel B). La infección por el VIH en pediatría tiene particularidades propias. La progresión de la enfermedad, en ausencia de tratamiento, es más rápida en niños infectados por transmisión vertical, que en adultos, adolescentes e incluso que en niños infectados por otras vías (transmisión sexual o parenteral)<sup>9</sup>. Por este motivo, y sabiendo que la mayoría de los niños se infectan por vía vertical, es importante conocer y detectar a tiempo a las madres VIH/SIDA, para realizar el diagnóstico temprano en los niños.

Explicación de términos. Diagnóstico tardío: paciente que en su primer contacto con la AE (consulta VIH o ingreso hospitalario), presenta  $<200$  linfocitos T CD4 $^{+}$ /mm $^3$  o  $<15\%$  en caso de ser menor de 6 años, o un evento definitorio de SIDA pasado o presente. AE: incluye consulta externa y hospitalización.

**7-CV plasmática:** La determinación de la CV plasmática es un parámetro fundamental para evaluar la respuesta al TARV, y junto con el recuento de los linfocitos T CD4 $^{+}$  son los más potentes predictores de progresión y de respuesta al TARV, así como para el inicio del mismo (Nivel B)<sup>9,12</sup>.

En la valoración de la CV como predictor de progresión de la enfermedad se debe considerar la edad del niño ([www.pentatrials.org](http://www.pentatrials.org)).

Explicación de términos. Valoración inicial: valoración realizada durante la primera y la segunda visita al centro.

**8-Determinación de linfocitos T CD4+:** El recuento de linfocitos T CD4+ es un marcador predictor independiente de progresión clínica y de respuesta al TARV, y por ello se debe monitorizar periódicamente, al menos cada 3-4 meses (Nivel B)<sup>9</sup>.

La valoración se hará teniendo en cuenta el porcentaje de linfocitos T CD4 + en niños entre 1 y 6 años de edad y el número absoluto de linfocitos T CD4+ a partir de esa edad<sup>34</sup>. De la misma forma, se debe tener en cuenta el porcentaje o el número absoluto, según la edad, para iniciar profilaxis de infecciones oportunistas (IO)<sup>35</sup>.

Explicación de términos. Valoración inicial: valoración realizada durante la primera y la segunda visita al centro. Determinación de subpoblaciones linfocitarias: determinación de linfocitos T CD4+/CD8+ en número absoluto y en porcentaje.

**9-Educación sanitaria en la valoración inicial:** Dado el estigma social que todavía supone el VIH/SIDA, no solo para el niño y adolescente que la padece, sino también para la familia, se debe informar con metodología clara y concisa acerca de los modos de transmisión, conductas de riesgo, prevención y tratamiento, debiéndose realizar ya en la primera visita. Se debe hacer especial hincapié en la población adolescente, por las peculiaridades propias de esta etapa de la vida. Cada adolescente es diferente, por lo que la información

sobre su infección debe darse individualmente y adaptada a sus características psicológicas, madurativas y sociales (Nivel C)<sup>13</sup>.

Explicación de términos. Educación sanitaria: constancia escrita de que se ha proporcionado información sobre aspectos básicos de la infección VIH, modos de transmisión, formas de prevenirla, evolución de la enfermedad y opciones terapéuticas. Valoración inicial: valoración realizada durante la primera y segunda visita al centro.

**10-Valoración social al inicio:** La mayoría de los niños infectados por el VIH son hijos de madres infectadas con transmisión del virus durante el embarazo, el parto o la lactancia, por lo que suelen integrar un entorno donde hay más de una persona que vive con el VIH/SIDA, o que falleció por esta causa, con la repercusión social y psicoemocional que esto implica. También en este contexto hay una mayor prevalencia de uso de drogas por vía parenteral y precariedad socioeconómica, problemática que se debe manejar actuando de forma interdisciplinaria y enfatizando en la población adolescente, que es la más vulnerable (Nivel C)<sup>9</sup>.

Explicación de términos. Anamnesis social: constancia escrita de la situación de todos los aspectos siguientes: nivel de estudios, tanto del niño o adolescente como de sus padres y/o tutores, situación laboral de padres y/o tutores, condiciones de la vivienda, personas que conviven y país de origen. Valoración inicial: valoración realizada durante la primera y segunda visita al centro.

**11-Pacientes con recuento de linfocitos T CD4+ <350/mm<sup>3</sup> (≥6 años) o <15%CD4+ (<6 años), sin TARV:** El objetivo del TARV es alcanzar una supresión completa y duradera de la replicación del VIH, con reducción de la

morbimortalidad asociada a la infección y mejoría de la calidad de vida. En los menores de 12 meses, una vez confirmada la infección, siempre está indicado el tratamiento, independientemente de la CV y los linfocitos T CD4+, mientras que en los mayores de esta edad el inicio de TARV debería indicarse por criterios clínicos y/o parámetros inmunológicos o virológicos. En los pacientes asintomáticos el inicio del TARV se basa en la cifra de linfocitos T CD4+, la CV plasmática y las comorbilidades del paciente. De todos los anteriores, la cifra de linfocitos T CD4+ es el parámetro más importante a la hora de decidir el inicio del TARV (Nivel A). En los pacientes con una cifra de linfocitos T CD4+  $<350/\text{mm}^3$  en  $\geq 6$  años de edad o  $<15\%$  CD4+ en los menores de esta edad se recomienda iniciar TARV<sup>12,34</sup>.

Explicación de términos. Pacientes con recuento de linfocitos T CD4+  $<350/\text{mm}^3$  ( $\geq 6$  años) o  $<15\%$  ( $<6$  años). Pacientes que tienen 2 determinaciones consecutivas de linfocitos T CD4+ por debajo de estos límites en función de su edad.

### **Seguimiento e intervenciones orientadas a la prevención**

**12-Periodicidad de las visitas (seguimiento regular):** El seguimiento clínico comprende los cuidados médicos generales, la monitorización de la progresión de la enfermedad por VIH, el tratamiento de la infección VIH, la profilaxis de las IO, la evaluación de la salud mental y su tratamiento, y la educación sanitaria y apoyo tanto para el paciente como para la familia (Nivel C)<sup>9</sup>.

Se recomienda realizar un seguimiento clínico más estrecho en los niños  $<1$  año, por el mayor riesgo de progresión y el menor valor predictivo del recuento de linfocitos T CD4+ y de la CV. Los controles deben realizarse cada 1-2

meses con el objetivo de identificar la posibilidad de progresión rápida de la enfermedad. En los niños mayores de esta edad, los controles inmunoviroológicos se harán cada 3-4 meses<sup>9</sup>.

Explicación de términos. Seguimiento adecuado: aquel en el que durante el período analizado se cumplen todos los siguientes requisitos: acudir al menos a 1 revisión clínica con constancia documentada de control analítico de linfocitos T CD4+, CV y análisis protocolizados cada 3 meses. Este seguimiento será independiente de la toma de TARV.

**13-Estudio renal básico en pacientes VIH:** Existe suficiente evidencia que establece que la enfermedad renal es una complicación importante de la infección por VIH y que puede estar asociada con la progresión a SIDA y muerte. Por ello los profesionales que asisten a esta población están en posición única para identificar a los pacientes en riesgo de enfermedad renal y aplicar estrategias preventivas y terapéuticas (Nivel C).

Explicación de términos. Estudio renal básico: analítica sanguínea que incluya creatinina y fósforo, tira reactiva de orina para evaluar si existe glucosuria y proteinuria y estimación del filtrado glomerular mediante las fórmulas de Schwartz o de Cockcroft-Gault según sea el paciente menor o mayor de 12 años, respectivamente, al diagnóstico de la infección VIH y posteriormente de forma bienal si el estudio es normal. En caso de alteraciones se realizará la derivación oportuna al nefrólogo (Nivel C)<sup>9</sup>. En caso de recibir antirretrovirales con posible toxicidad renal como tenofovir o indinavir se monitorizará la función renal mediante vigilancia clínica, bioquímica y tira de orina al menos cada 6 meses (Nivel B)<sup>9,16,17</sup>.



**14-Valoración de enfermería:** La integración de los distintos profesionales en el seguimiento del paciente VIH es fundamental, desde la edad escolar donde se informa sobre su enfermedad hasta la adolescencia y el consiguiente paso a la consulta de adultos. Se debe generar un ambiente de confianza, donde el niño o adolescente y su entorno se sientan integrados, creando un espacio abierto al diálogo donde se puedan resolver todas las dudas que surjan con respecto a la enfermedad. Deben procurarse todos los medios y un equipo multidisciplinar para ayudar a la familia y/o cuidadores a realizar de forma correcta el tratamiento pautado y asegurar un buen control de los pacientes<sup>12</sup>. En este contexto, el profesional de enfermería tiene un papel esencial en la atención integral del paciente VIH (educación sanitaria, adherencia al TARV, etc.) (Nivel C).

Explicación de términos. Valoración por personal de enfermería: constancia en la documentación clínica de la realización por parte de enfermería de tareas como: a) apoyo a la adherencia al TARV; b) evaluación de necesidades; c) identificar factores que dificulten la adherencia. La valoración debe realizarse por lo menos una vez durante el primer año de seguimiento.

**15-Detección de la infección tuberculosa latente (ITL):** Numerosos estudios han documentado el mayor riesgo de tuberculosis (TBC) tanto en adultos como en niños infectados por el VIH<sup>35</sup>. Se debe realizar una prueba tuberculínica (PT) en el momento del diagnóstico de infección por el VIH en los mayores de un año de edad y en caso de sospecha clínica (Nivel A).

Explicación de términos. Pruebas de detección de ITL: Realización de una PT y/o quantiferon/IGRA en un plazo no superior a 6 meses desde el inicio del seguimiento en la unidad de VIH.

**16-Vacunación frente a la hepatitis A (VHA):** Se recomienda vacunar frente al VHA a todos los niños infectados por el VIH, especialmente en coinfectados por el virus de la hepatitis B y/o C (VHB y/o VHC), por riesgo de hepatitis fulminante durante la primoinfección por el VHA. La vacunación se lleva a cabo con 2 dosis de vacunas separadas por 6-12 meses. Se recomienda determinar títulos de anticuerpos entre 1 y 3 meses después de la vacunación, administrando una dosis de refuerzo si fuera necesario, ya que con dos dosis a menudo se alcanzan bajos niveles de anticuerpos protectores (Nivel A)<sup>18</sup>.

Explicación de términos. Indicación de vacuna: la realizada en cualquier momento del seguimiento clínico.

**17-Vacunación frente a la hepatitis B (VHB):** Los niños con un buen control inmunoviológico presentan mejor respuesta a la vacuna frente al VHB, tanto en primovacunación como en revacunación. En general, se recomienda la pauta habitual de 0, 1 y 6 meses, por ser más inmunógena. Entre 1 y 3 meses después de completar la vacunación, se recomienda determinar los títulos de anticuerpos; si se encuentran por debajo del mínimo nivel protector (10mU/ml) se debe revacunar con 3 dosis más (Nivel A)<sup>18</sup>.

Explicación de términos. Indicación de vacuna: la realizada en cualquier momento del seguimiento clínico.

**18-Vacunación frente a la infección neumocócica:** El riesgo de enfermedad neumocócica está aumentado en niños VIH entre 3 y 41 veces respecto al niño inmunocompetente<sup>19</sup>. En estos pacientes se pueden emplear esquemas mixtos con vacuna conjugada, preferiblemente con la tridecavalente (VNC-13v), y no conjugada 23-valente (VNnC-23 v). La vacuna conjugada debe seguir el mismo esquema que para niños sanos siempre con esquemas 3+1 (2, 4, 6 y 12-15

meses), aunque el esquema oficial vigente fuese 2+1. El CDC extiende la edad de vacunación antineumocócica conjugada en niños inmunodeprimidos hasta los 18 años (Nivel A)<sup>18</sup>.

Explicación de términos. Indicación de vacuna: la realizada en cualquier momento del seguimiento clínico.

**19-Profilaxis frente a *Pneumocystis jirovecii* y *Toxoplasma gondii* en pacientes con linfocitos T CD4+ <200 /mm<sup>3</sup> (≥6 años) o <15% (<6 años) y en todos los menores de 12 meses:** Con respecto a *P. jirovecii*, el 80% de los niños de 2 a 4 años presentan anticuerpos contra este microorganismo que produce infecciones respiratorias graves en inmunocomprometidos<sup>35</sup>. La neumonía por *P. jirovecii* es una complicación temprana de la infección por VIH adquirida en el período perinatal y se asocia con una tasa de mortalidad elevada. En la profilaxis primaria se indica trimetoprim-sulfametoxazol a días alternos. Como alternativas se consideran dapsona o pentamidina por vía nebulizada o endovenosa (Nivel A).

La encefalitis por *T. gondii* es un cuadro poco común en niños VIH como evento diferente a la infección congénita. Al igual que en los adultos, el mayor riesgo se da en los niños gravemente inmunodeprimidos (linfocitos T CD4+ <100/mm<sup>3</sup> en caso de adolescentes o <15% en los niños) con IgG positiva frente a este microorganismo. El régimen preferido para la profilaxis de esta entidad es la administración diaria de trimetoprim-sulfametoxazol<sup>35</sup>.

Explicación de términos. Profilaxis frente a *P. jirovecii* y *T. gondii*: administración de los fármacos indicados por vía oral a dosis correctas.

**20-Tratamiento y prevención del tabaquismo:** Entre los adolescentes el tabaco es la segunda droga más consumida y la que más precozmente se

empieza a utilizar, con una edad media de inicio en el hábito de 13 años. Los jóvenes con hábito de fumar no asumen los efectos adversos que el tabaco ocasiona a corto y largo plazo sobre su salud<sup>13</sup>. Entre los 14 y los 20 años, el consumo de tabaco llega a superar el 50%, siendo los adolescentes españoles los más precoces en su consumo en los países de nuestro entorno<sup>36</sup>. La mortalidad está aumentada en la población VIH con tabaquismo activo existiendo una relación con los paquetes-año fumados. Se recomienda realizar intervención activa sobre los pacientes fumadores atendidos en las consultas (Nivel A). Por todo ello debemos realizar las actividades preventivas necesarias en los adolescentes a través del manejo multidisciplinario.

Explicación de término. Tabaquismo activo: toda persona que fuma a diario durante los últimos 30 días, independientemente de la modalidad y cantidad. Intervención: realización de cualquiera de las siguientes alternativas: preguntar en cada consulta si continúa fumando y si ha pensado en dejarlo, y si necesita ayuda para conseguirlo, remitir al paciente a una unidad específica, proporcionar recomendación verbal o escrita (debe quedar constancia en la historia clínica de que se ha realizado). Intervención avanzada: consejo, apoyo psicológico, fármacos y seguimiento.

**21-Evaluación de la ingesta de alcohol:** El consumo de alcohol en España suele iniciarse alrededor de los 13 años. El 75,1% de los adolescentes de 14-18 años ha consumido alcohol alguna vez en su vida. El consumo de alcohol produce en los adolescentes graves efectos sobre su salud física, psíquica y social, al no haberse completado su desarrollo, y aumenta la probabilidad de ser dependiente del alcohol en la edad adulta<sup>37</sup>. El consumo de alcohol reduce la efectividad del tratamiento antirretroviral de gran actividad (TARGA) e

incrementa la toxicidad hepática de los inhibidores de la proteasa<sup>38</sup>. Dado que los adolescentes son la población más vulnerable, debemos enfatizar las medidas de prevención en ellos, siempre con el manejo multidisciplinario (Nivel C).

Explicación de términos. Ingesta alcohólica: constancia en la documentación del paciente de la ingesta cuantificada en gramos o unidades de bebida estándar (UBE).

**22-Seguimiento de medidas de prevención de riesgos:** En la historia clínica de los pacientes infectados por el VIH es muy importante realizar una investigación de los hábitos sexuales, para detectar conductas de riesgo que pudieran llevar un aumento en la frecuencia de adquisición de enfermedades de transmisión sexual (ETS). Factores como la edad de inicio de las relaciones sexuales, el tipo de actividad sexual, el número de compañeros sexuales, el tipo de práctica sexual (oral, anal, vaginal), la utilización o no de métodos contraceptivos/barrera, etc., resultan determinantes.

Si se evitan estas conductas, se disminuye el riesgo de transmisión del VIH a la pareja, de adquisición de otras ETS y de embarazos no deseados<sup>13</sup>.

Toda la información se debe llevar a cabo con material acorde a estas edades, con metodología clara y comprensible. Se debe aprovechar cada visita para realizarla. Los profesionales de la salud tendrán que dedicar tiempo y esfuerzo para hacer que la información brindada a los adolescentes sea flexible, accesible, confidencial y culturalmente apropiada (Nivel C)<sup>39</sup>.

Explicación de términos. Exploración de conductas de riesgo: realización de una entrevista dirigida y/o entrega de material didáctico y explicativo sobre conductas de riesgo.

**23-Tratamiento de la ITL:** La ITL se define como una situación en la que el niño presenta una PT positiva, está asintomático y con radiografía de tórax normal. El empleo de isoniácida durante el tiempo adecuado en el tratamiento de la ITL disminuye en un 50-80 % el riesgo de enfermedad por bacilos sensibles a la isoniácida prolongándose esta protección durante más de 20 años (Nivel A)<sup>40</sup>.

Explicación de términos. Tratamiento de la exposición a TBC o de la ITL: administración de isoniácida o isoniácida más rifampicina/rifabutina durante 3-6 meses. Se deberá individualizar en caso de contacto con tuberculosis multirresistente.

**24 y 25- Pérdidas de seguimiento y recuperación de citas fallidas:** Las visitas regulares son un factor crítico para monitorizar la evolución de la enfermedad y promover la adherencia al tratamiento. En pacientes en tratamiento, varios estudios han puesto de manifiesto la relación entre la adhesión de los pacientes a las visitas de revisión programadas y una mayor probabilidad de tener una CV indetectable (Nivel B).

Explicación de términos. Pacientes perdidos en seguimiento: pacientes sin registro de visitas en consulta en los 12 meses previos a la fecha de evaluación. Pacientes en programa: todos los pacientes infectados por el VIH controlados en el centro y aún no se hayan dado de baja al inicio del período estudiado (12 meses). Cita fallida: visita programada a la que no acude el paciente sin justificación previa. Nueva citación: programación de visita en sustitución de la visita fallida en los 6 meses siguientes.

**26-Informe periódico de consulta:** Su realización facilita la información sobre el resultado de las pruebas realizadas, diagnósticos clínicos y el plan de

tratamiento, elementos necesarios para que pueda existir una actividad compartida entre los diferentes niveles asistenciales (Nivel C).

Explicación de términos. Informe de consulta: documento escrito, que contiene como mínimo: datos de identificación del paciente, el hospital y el médico que emite el informe, diagnósticos relativos a la infección VIH, con estadio CDC, últimos linfocitos T CD4+ y CV, tratamiento actual y patologías o tratamientos concomitantes. Informe periódico: el emitido como mínimo una vez al año, y siempre que se produzca un cambio de tratamiento.

**27-Calidad percibida por los pacientes:** Entre las dimensiones de calidad del servicio, destaca la satisfacción del usuario. En esta línea, y con el empeño de potenciar la atención centrada en el paciente, resulta necesario poder evaluar periódicamente su opinión en relación al servicio recibido.

Esta información, incorporada como un elemento más de la gestión, ha de permitir enfocar cada vez más el servicio a las expectativas de los pacientes (Nivel C).

Explicación de términos. Estudio de opinión: realización de un cuestionario específico para pacientes de la consulta de VIH o en su defecto de la encuesta general del hospital o de consultas externas. El cuestionario debe contemplar como mínimo aspectos relacionados con: información al paciente y familiares, trato personal, apoyo psicosocial, confort, confidencialidad y accesibilidad. Es recomendable que el estudio se acompañe de conclusiones y propuestas de mejora en función de los resultados obtenidos.

## **Seguimiento de pacientes en tratamiento**

### **28-Adecuación de las pautas iniciales de TARV a las guías españolas**

**(CEVIHP/SEIP/AEP/PNS):** Como terapia de inicio está indicada una combinación de al menos 3 antirretrovirales de al menos 2 familias de fármacos, incluyendo 2 inhibidores de la transcriptasa inversa análogos de nucleósidos o nucleótidos (ITIAN/ITIANt) junto con un inhibidor de la proteasa (IP) o un inhibidor de la transcriptasa inversa no análogo de nucleósidos (ITINN). Siempre habrá que tener en cuenta las características de cada paciente y el test de resistencias para elegir uno u otro. El objetivo de la terapia antirretroviral es alcanzar la supresión viral en las primeras 24-48 semanas de inicio del tratamiento<sup>12</sup>.

Explicación de términos. Inicio del TARV: pacientes a los que se prescribe su primer TARV. Pautas de CEVIHP/SEIP/AEP/PNS: recomendaciones nacionales vigentes en el momento de realizar la evaluación.

**29-Inicio del TARV en pacientes con eventos sintomáticos B o C:** El inicio precoz del TARV en los pacientes con síntomas de eventos B o C disminuye la morbimortalidad (Nivel A).

En pediatría, a partir del primer año de vida está indicado el TARV en niños con categoría clínica C o linfocitos T CD4+ <15%, o <20% para niños entre 1 y 3 años (Nivel B). Se debe considerar iniciar TARV en niños con eventos de clase B y/o CV elevada (superior a 250000 copias/ml) (Nivel B).

Se recomienda diferir el TARV y realizar vigilancia estrecha en niños con eventos de clase N o A y porcentaje de linfocitos T CD4+ >20% y CV <250000 copias/ml (Nivel C)<sup>12</sup>.



Explicación de términos. La definición de eventos B o C es la recogida en la definición de caso y clasificación de los CDC<sup>12</sup>.

**30-Primera visita tras la instauración de un TARV:** La primera visita tras el inicio del TARV se debe realizar de forma precoz (4-8 semanas). En esta primera consulta es muy importante valorar, entre otras, la adherencia y la toxicidad del TARV (Nivel B).

Explicación de términos. Primera visita tras el inicio del TARV: la que se realiza de forma programada tras las primeras 4-8 semanas del inicio del TARV.

**31- CV plasmática indetectable (<50 copias/ml) en la semana 48 de TARV:**

El objetivo del TARV es suprimir la replicación viral. La CV plasmática desciende rápidamente al inicio del TARV. En el paciente adulto la mayoría de las combinaciones de TARV logran CV indetectables en la semana 48 de tratamiento (Nivel A-B)<sup>11</sup>, mientras que hasta un 45-50% de los pacientes pediátricos que reciben TARGA no consiguen este objetivo al año de iniciar el tratamiento<sup>29,30</sup>.

**32-Tratamiento con abacavir (ABC) sin HLA-B\*5701 previo:** Estudios farmacogenéticos han identificado que la reacción de hipersensibilidad al ABC ocurre casi exclusivamente en las personas portadoras del alelo HLA-B\*5701<sup>41</sup>. Su incidencia se estima en el 5%. Las manifestaciones del síndrome de hipersensibilidad al ABC más frecuentes en los niños son el exantema y las alteraciones gastrointestinales (81% y 70% respectivamente)<sup>12</sup>.

En el momento actual, antes de iniciar el tratamiento con ABC se debe realizar esta genotipificación y si ésta es positiva, se debe contraindicar el uso de ABC (Nivel A).

Explicación de términos. Reacción de hipersensibilidad a ABC: síndrome multiorgánico que se manifiesta con una combinación variable de fiebre, mialgias, síntomas respiratorios y gastrointestinales, y un exantema de intensidad creciente. Puede llegar a ser mortal en el caso de continuar con el tratamiento o reintroducirlo.

**33-Cambios de tratamiento durante el primer año:** Aun cuando muchos de los pacientes en TARV mantienen la misma pauta durante años, ésta deberá ser reevaluada durante el seguimiento, y no es infrecuente que requieran una modificación del TARV que están recibiendo (Nivel B). En estudios de series pediátricas el cumplimiento adecuado del TAR se encontró entre el 76%-81%, lo que puede explicarse por la mayor preocupación de los padres o cuidadores por los niños. Sin embargo, es difícil mantener un alto nivel de cumplimiento de forma continuada, sobre todo cuando el paciente se encuentra asintomático y aparecen efectos secundarios o intolerancias por la medicación, siendo necesario insistir en cada visita de seguimiento<sup>12</sup>. Así también puede ser menor el cumplimiento en niños menores de 1 año, por el rechazo o la dificultad en administrar la medicación. Otra etapa donde el cumplimiento disminuye es la adolescencia.

Explicación de términos. Cambio de fármaco: sustitución de uno o más de los antirretrovirales de la pauta inicial, no considerándose cambio las modificaciones en la galénica de los fármacos.

**34-Registro de adherencia al tratamiento:** Estudios prospectivos en niños han demostrado que el riesgo de fracaso virológico está directamente relacionado con el número de dosis de medicación omitidas, que facilitan la aparición de resistencias y limitan la eficacia de futuras nuevas pautas de

tratamiento<sup>9</sup>. En la infección por el VIH se requiere un cumplimiento terapéutico superior al 95% para evitar que el virus pueda multiplicarse y desarrollar resistencias (Nivel B)<sup>12</sup>.

Explicación de términos. Valoración de la adherencia: se puede llevar a cabo por métodos indirectos, como los sistemas de control electrónico, los cuestionarios estructurados validados —SMAQ, SERAD— (Nivel A) y recuento de medicación/registro farmacéutico o mediante valoración directa y subjetiva por parte del profesional sanitario (Nivel B).

**35-Estudio de resistencias en el fracaso virológico:** La transmisión de cepas resistentes a antirretrovirales ha sido ampliamente documentada y se ha asociado a fracaso del TARV<sup>12</sup>.

Aunque el beneficio de los tests de resistencia para guiar el tratamiento del niño en fracaso virológico no es tan claro como en adultos, es recomendable realizarlo para orientar el tratamiento de rescate. En un paciente que recibe TARV en fracaso virológico, la no detección de mutaciones obedece mayoritariamente a falta de cumplimiento<sup>12</sup>.

Por ello, las recomendaciones nacionales e internacionales aconsejan solicitar un estudio de resistencias genotípicas para adecuar el TARV de rescate (Nivel A).

Explicación de términos. Fracaso virológico: CV plasmática detectable tras 24 semanas de TARV, o si tras alcanzar una CV indetectable (<50 copias/ml) ésta vuelve a hacerse detectable en 2 determinaciones consecutivas. Test de resistencia: test genotípico reciente realizado tomando el paciente la última pauta de TARV prescrita. Pacientes en TARV: pacientes que han recibido alguna dosis de TARV en los últimos 6 meses.

**36-Respuesta al TARV en situación de fracaso avanzado:** El objetivo del TARV en situación de fracaso sigue siendo la supresión completa de la replicación viral, utilizando la técnica más sensible disponible para determinación de la CV. En el paciente pediátrico el fracaso terapéutico se define como una respuesta inadecuada al TARV, ya sea clínica, inmunológica o virológica<sup>12</sup>. En relación con el adulto, la CV es más alta, la respuesta al tratamiento más lenta y se consigue menos veces la supresión total de la viremia, a pesar de combinaciones potentes. El fracaso virológico de  $\geq 2$  pautas de TARV supone una menor posibilidad de éxito en los TARV sucesivos y una mayor incidencia de SIDA y muerte (Nivel C). No obstante, la disponibilidad de nuevos fármacos permite plantear en esta situación el objetivo de lograr la máxima supresión viral ( $<50$  copias/ml).

Explicación de términos. Multifracaso: paciente en el que han fracasado al menos 2 pautas previas de TARV y presenta un nuevo fracaso virológico (persistencia de CV  $>50$  copias/ml en 2 determinaciones sucesivas) o con resistencia genotípica a 3 familias de ARV.

**37-Gasto medio por paciente en primer tratamiento:** La incorporación del TARGA en la infección VIH ha supuesto una importante mejora para los pacientes, tanto en niños como en adultos, disminuyendo la mortalidad, evitando la progresión a SIDA y disminuyendo la transmisión vertical<sup>31</sup>. Aunque las pautas de tratamiento en el caso de la terapia de rescate están muy condicionadas por factores como resistencias, adherencia o toxicidad, en el caso del paciente sin fracaso previo o en situación de primer fracaso, es importante incluir el concepto de eficiencia (relación entre coste y resultados) en la toma de decisiones para seleccionar la mejor alternativa (Nivel C).

Explicación de términos. Gasto anual: sumatorio de coste de los antirretrovirales dispensados por la farmacia externa en todos los pacientes que han iniciado TARV en el período evaluado. Periodo evaluado: todos los pacientes incluidos en la valoración del indicador deben cumplir como requisito haber cumplido 12 meses desde su inicio de TARV; se incluyen todos los pacientes que han iniciado el TARV en los últimos 5 años. El coste se estimará según el precio estipulado en las recomendaciones de CEVIHP/SEIP/AEP/PNS vigentes<sup>31</sup>.

### **Aspectos específicos en la mujer**

**38-Incidencia de transmisión vertical:** En la población pediátrica, ésta es la principal vía de transmisión. Según datos de CoRISpe (actualizados a noviembre de 2011) representa el 97%, seguida de la vía transfusional<sup>3</sup>. Desde que se dispone del TARGA, la tasa de transmisión vertical (número de niños que se infectan por cada 100 embarazadas VIH positivas) en Europa ha ido disminuyendo hasta cifras < 2% (Nivel B).

Explicación de términos. Transmisión vertical: Se define como aquella que se produce en tres de los siguientes tiempos: intraútero, intraparto o a través de la lactancia materna.

### **Comorbilidades**

**39-Evaluación del paciente coinfectado por VHC:** La coinfección VIH-VHC es menos frecuente en la edad pediátrica que en el paciente adulto (7,8% según datos de CoRISpe) y la enfermedad se presenta en estadios menos avanzados<sup>42</sup>. Aun así, los pacientes pediátricos coinfectados por el VHC tienen

mayor riesgo de progresión y daño hepático que los pacientes infectados sólo por el VHC<sup>43</sup>, por lo que debe contemplarse realizar tratamiento con interferon pegilado y ribavirina<sup>44,45</sup>. Todo ello justifica la conveniencia de identificar a los pacientes que son tributarios del tratamiento de la infección, que se detecta por la positividad de la viremia (Nivel A). Existen pocos estudios publicados que muestren el efecto del tratamiento de VHC en niños y adolescentes coinfectados<sup>46,47</sup>.

Explicación de términos. Serología positiva frente a VHC: determinación por técnicas de ELISA de los anticuerpos frente a VHC.

**40-Pacientes con HBsAg positivo que reciben tratamiento eficaz:** Los casos pediátricos de coinfección VIH-VHB son habitualmente secundarios a embarazos no controlados, en los que no se realizó profilaxis frente a la transmisión vertical del VHB con gammaglobulina y vacuna<sup>12</sup>. La hepatitis B tiene una evolución más agresiva en los pacientes VIH y se asocia a una mayor mortalidad (Nivel B). Varios fármacos antirretrovirales son también eficaces frente al VHB, por lo que en general se aconseja abordar el tratamiento de ambas infecciones simultáneamente (Nivel B). La interrupción del tratamiento de la hepatitis B puede producir rebrotes de actividad inflamatoria grave, por lo que se debe evitar (Nivel B).

Explicación de términos. Tratamiento eficaz: aquel que incluye al menos 1 de los siguientes fármacos: tenofovir, lamivudina, emtricitabina, adefovir, entecavir o telvibudina.

**41-Control ecográfico de la hepatopatía:** La coinfección VIH-VHC es poco frecuente en la edad pediátrica, donde la mayoría de niños se han infectado por ambos virus por transmisión vertical o a través de la transfusión de hemoderivados contaminados, previo al cribado de los mismos<sup>12</sup>.

Los pacientes adultos coinfectados por VIH y virus hepatotropos, tienen mayor riesgo de progresión a cirrosis hepática, fibrosis hepática y hepatocarcinoma que aquellos sólo infectados por el VHC.

Las infecciones crónicas por VHB y VHC son responsables de más del 80% de los casos de hepatocarcinoma. La mayoría de ellos se produce en los pacientes con cirrosis. Para la detección precoz del hepatocarcinoma está indicada la realización de una ecografía abdominal cada 12 meses en todo paciente cirrótico, independientemente de la causa (Nivel A).

El aumento de supervivencia de los pacientes pediátricos infectados por el VIH nos obliga a enfrentarnos a este nuevo problema<sup>12</sup> y realizar el seguimiento estipulado por las guías en los coinfectados.

Explicación de términos. Cirrosis: biopsia hepática con diagnóstico de cirrosis o elastometría hepática con lecturas >12,5 KPa o pruebas bioquímicas compatibles con fibrosis avanzada (APRI con una puntuación >2, FIB4 >3,25) o descompensación hepática previa (encefalopatía hepática, descompensación icteroascítica, síndrome hepatorenal o varices esofágicas).

### **Hospitalización**

**42-Incidencia de ingresos de pacientes en seguimiento:** Las tasas de hospitalización son importantes por: a) ser un indicador útil de la eficacia y durabilidad del TARV en prevenir las IO y otros eventos relacionados con SIDA

y b) permitir detectar potenciales toxicidades a corto y largo plazo del TARV y su relación con eventos no relacionados con SIDA. Conocer las tasas de ingresos permite calcular los gastos por ingreso hospitalario de la población en estudio y realizar análisis adecuados de coste-eficiencia (Nivel B). A partir de 1997 y debido a la introducción del TARGA, se observó una importante reducción en la tasa admisiones hospitalarias, también en el paciente pediátrico<sup>11,48,49</sup>.

Explicación de términos. Paciente ingresado: paciente en seguimiento ambulatorio que ingresa por cualquier motivo en el hospital de referencia. Personas-año en seguimiento: sumatorio de años en seguimiento de los pacientes con infección VIH atendidos en consultas externas.

**43-Pacientes con informe de alta tras la hospitalización:** El informe de alta es el documento que todo hospital, público o privado, debe entregar obligatoriamente al paciente o sus familiares cuando es dado de alta médica, fallece o solicita el alta voluntaria (Nivel C).

Explicación de términos. Informe clínico de alta: documento en el que constan como mínimo todos los ítems requeridos por ley (BOE): nombre del facultativo, nombre del paciente, fecha de nacimiento (o edad) y sexo, número de la historia clínica, fecha de admisión y de alta, motivo de ingreso, diagnósticos principales y secundarios (si procede), procedimientos diagnósticos y quirúrgicos, resumen de la historia clínica (antecedentes, etc.), recomendaciones terapéuticas al alta, estado en el momento del alta y destino al alta.

**44- Informes de alta en pacientes fallecidos en el hospital:**



Explicación de términos. Informe clínico de alta: documento emitido por el médico responsable de un paciente tras su fallecimiento en un centro hospitalario, cuyo contenido contemple los requisitos requeridos por ley (BOE). Pacientes VIH fallecidos en hospitalización: sujetos codificados con alta tipo 5 en el Conjunto Mínimo Básico de datos o CMBD (Nivel C).

**45-Seguimiento en consultas externas tras el alta hospitalaria:** Es especialmente importante el seguimiento adecuado de los pacientes con diagnóstico reciente de infección VIH o que han sufrido IO (Nivel B).

Explicación de términos. Ingreso relacionado con infección VIH: pacientes con infección VIH ingresados en el hospital. Paciente VIH: todo paciente con diagnóstico VIH al alta, ya sea como diagnóstico principal o secundario. Seis meses: período máximo transcurrido entre el alta hospitalaria y la visita ambulatoria en consultas externas.

**46-Autopsias-necropsias en pacientes VIH fallecidos:** En el paciente adulto el 24% de las autopsias clínicas pone de manifiesto la existencia de errores en la identificación de la causa de la muerte (error tipo I) y en el 9% de casos la corrección de estos errores podría haber cambiado el pronóstico del paciente (error tipo II) (Nivel C). En los pacientes con infección VIH los errores de tipo I pueden alcanzar el 44-70% y los de tipo II el 33-36%. Por tanto, es necesario conocer las causas de la muerte en pacientes con infección VIH; esto puede servir también para identificar cambios en las causas de la muerte y establecer prioridades en la atención.

Explicación de términos. Autopsia o necropsia: estudio anatómico e histológico de las diferentes partes de un cadáver, ya sea con apertura de las 3 cavidades

(autopsia total) o sólo 2 cavidades (autopsia parcial), para determinar las causas de la muerte.

### **Índices de mortalidad**

**47-Tasa de mortalidad global en pacientes en seguimiento:** El objetivo del TARV es disminuir la mortalidad y la morbilidad de los pacientes con infección VIH, ya sea relacionada con la propia infección y sus consecuencias o en relación a otras causas prevalentes en la población general (accidentes de tráfico, trastornos genéticos y del desarrollo presentes al nacer, neoplasias, etc.) (Nivel C)<sup>50</sup>. Aunque desde la introducción del TARGA se ha observado una disminución significativa de todas las causas de mortalidad en la población VIH, la esperanza de vida de los pacientes con infección VIH que reciben TARV es aún menor que la de la población general (Nivel B) y los pacientes con diagnóstico tardío o con abandono del seguimiento mantienen un riesgo elevado de complicaciones con riesgo vital relacionadas con la infección por VIH. Del mismo modo, este descenso en la mortalidad se ha evidenciado en el paciente pediátrico con infección por el VIH<sup>11</sup>.

Explicación de términos. Pacientes fallecidos: incluye a los fallecidos en el hospital y en el domicilio.

**48-Tasa de mortalidad global por causas relacionadas con el SIDA:** Con el TARV se ha logrado disminuir tanto la mortalidad global como la relacionada con eventos definitorios de SIDA (Nivel B). Las muertes por causas relacionadas con el SIDA en niños menores de 15 años han disminuido en un 20% entre el año 2005 y el 2010 (<http://www.unaids.org>).

Explicación de términos. Causa de muerte relacionada con SIDA: si durante el episodio que causó la muerte el enfermo sufrió algún evento definitorio de SIDA. Personas/año en seguimiento: sumatorio de años en seguimiento de los pacientes con infección VIH atendidos en consultas externas, es decir, personas activas en el programa.

### **Formación e investigación**

**49-Formación continuada:** La formación es un elemento esencial para el desempeño correcto y eficaz de un ejercicio profesional de calidad; sin ella, difícilmente se pueden plantear objetivos profesionales para resolver un problema o satisfacer una necesidad. De la misma manera es imprescindible disponer de formación suficiente y de calidad y coherente con las funciones y el papel del profesional médico. Esta necesidad es aún mayor en un campo como el del VIH, con un muy alto ritmo de investigación que se traduce rápidamente en modificaciones de la práctica clínica (Nivel C).

Explicación de términos. Profesionales en plantilla: médicos y diplomados en enfermería. Obtención de créditos: médicos: 3,5 créditos/2 años o 35 horas/2 años; diplomados enfermería: 2 créditos/2 años. Formación: contenido docente relacionado con los temas de trabajo de la unidad. La obtención de créditos debe proceder de organismos de acreditación nacionales o internacionales (Comisión de Formación Continuada del Sistema Nacional de Salud, Comunidades Autónomas, Sistema Español de Acreditación de la Formación Médica Continuada, European Accreditation Council for CME EACCME o ACCME).

**50-Publicaciones y comunicaciones en congresos:** La investigación es un componente más para evaluar el crecimiento profesional. La publicación en

forma de comunicaciones en congresos o artículos originales en revistas de prestigio son indicadores de los resultados de la investigación realizada en las unidades de VIH (Nivel C).

Explicación de términos. Publicaciones: artículo original publicado en revistas indexadas (nacionales o internacionales). Solo se tomarán en consideración aquellas en las que figure algún miembro del servicio o unidad. Se incluyen: editoriales y revisiones sistemáticas. Comunicaciones a congresos: comunicaciones aceptadas en congresos nacionales o internacionales promovidas por una sociedad científica o referenciadas en Pubmed.

**51-Participación en proyectos de investigación:** La investigación en biomedicina debe considerarse como una inversión indispensable para el éxito de cualquier estrategia orientada a mejorar la salud de los ciudadanos y la competitividad de las organizaciones sanitarias. La participación en proyectos de investigación con financiación competitiva identifica las unidades de VIH con una actividad investigadora consolidada (Nivel C).

Explicación de términos. Proyectos de investigación con financiación competitiva: proyectos financiados a través de programas de investigación de la Unión Europea, Plan Nacional de I+D, FIS, RIS, FIPSE, programas regionales o autonómicos. Ensayo clínico: la prueba de un medicamento o intervención médica realizada siguiendo un protocolo de estudio aprobado por una comisión de investigación, aceptada por el enfermo y amparada por la ley.

**INDICADORES ELABORADOS SEGÚN LAS GUÍAS DE CEVIHP/ SEIP/ AEP/ SPNS.**

## **Diagnóstico y evaluación inicial**

### **52-Contenidos relevantes de la valoración inicial del niño y adolescente**

**con VIH:** En la primera visita del paciente VIH es preciso realizar una historia clínica detallada, un examen psicofísico completo y las pruebas de laboratorio pertinentes (Nivel C). La evaluación inicial debe permitir el estadiaje clínico, inmunológico y virológico del niño, valorando en este momento la necesidad de intervenciones terapéuticas y profilácticas (Nivel C). Debe ponderarse la adaptación inicial de la familia al diagnóstico e iniciar el seguimiento del grado de conocimiento y comprensión de la infección (Nivel C)<sup>9</sup>.

Explicación de términos. Historia médica de la madre (o del contacto en el caso de transmisión sexual): cuantificación de linfocitos T CD4+, CV y subtipo de VIH, estadio clínico, coinfecciones, medicación antirretroviral, patrón de resistencias, abuso de drogas y alcohol. Historia obstétrica y perinatal: historia del embarazo y parto (tipo de parto, duración de la rotura de membranas, complicaciones), edad gestacional, peso y longitud de recién nacido, problemas médicos neonatales, historia de lactancia materna, tratamiento recibido durante la gestación, parto y periodo neonatal. Historia médica del niño o adolescente: medicación antirretroviral, síntomas recurrentes, comorbilidades, edad de pubertad, menstruación, hospitalizaciones, medicaciones crónicas, alergias, inmunizaciones, historia de crecimiento, historia de desarrollo, historia escolar (nivel, rendimiento), historia de comportamiento y salud mental, historia sexual. Historia familiar: historia familiar de enfermedades incluyendo VIH y TBC, fuente de cuidados para otros miembros de la familia con VIH, miembros de la familia que reciben TARV, historia de adopción y acogida, relación con los miembros de la familia biológica para niños en lugares de cuidado alternativo

(centro acogida, adoptivos, grupos hogar). Historia social: lengua principal en el hogar, creencias religiosas y culturales, datos legales relativos a la guarda y custodia, fuente de cuidados en el hogar.

**53-Pruebas complementarias en la valoración inicial del niño y adolescente con VIH:** En la valoración inicial del paciente VIH es preciso realizar, además de la anamnesis y la exploración física ya reseñadas en otros indicadores, un mínimo de exploraciones complementarias de cara a efectuar un adecuado balance pronóstico de la situación del enfermo, conocer posibles comorbilidades, efectuar cribado de infecciones latentes para su eventual profilaxis y adecuar el posible TARV (Nivel A y B)<sup>9</sup>.

Explicación de términos. Parámetros analíticos recomendados en la primera visita: serología VIH (ELISA y Western Blot) si no se ha realizado todavía, hemograma con recuento diferencial, inmunofenotipo linfocitario, HLA-B5701 en caso de inicio de abacavir, estudio de resistencias, CV, urea, creatinina, función hepática, colesterol y triglicéridos, serologías y marcadores de infección oculta de VHA, VHB y VHC, serologías de citomegalovirus, *T. gondii*, sífilis y virus herpes, análisis de orina, PT y/o IGRA, radiografía de tórax, electrocardiograma/ecocardiograma.

### **Seguimiento e intervenciones orientadas a la prevención.**

**54-Contenidos relevantes de la valoración inicial en la embarazada con infección VIH:** Dado que la captación precoz de la embarazada VIH influye sobre el futuro del recién nacido, se considera fundamental el manejo multidisciplinario por parte de las unidades de Ginecología y Obstetricia e Infectología pediátrica, realizando ambas las aportaciones pertinentes en el

binomio madre-hijo (Nivel C). Además, en determinados casos, puede ser necesario contar con atención psiquiátrica y brindar soporte social para facilitar el TARV.

Explicación de términos. Valoración inicial: constancia escrita del seguimiento de la gestación, parámetros analíticos relativos a la infección por el VIH, vigilancia de los efectos secundarios del TARV y control del bienestar fetal<sup>1</sup>.

**55-Seguimiento del hijo de madre VIH, no infectado:** Desde la introducción del TARGA y la profilaxis con zidovudina durante el embarazo, el parto y hasta las 4 semanas al recién nacido, se ha producido una notable disminución de la transmisión vertical hasta cifras inferiores al 1-2 % (Nivel C)<sup>10</sup>. Por este motivo, actualmente el seguimiento de estos niños no infectados es la situación más común relacionada con la infección VIH con la que se encuentra el pediatra general<sup>10</sup>.

Explicación de términos. Niño expuesto al VIH: recién nacido de madre VIH. Seguimiento ambulatorio: visita en consultas externas por un médico especialista según protocolo nacional actual<sup>10</sup>.

**56-Cribado de infecciones de transmisión sexual (ITS) en adolescentes con el VIH:** Para completar la historia clínica de los pacientes infectados por el VIH es muy importante realizar una investigación de los hábitos sexuales, que permita detectar conductas de riesgo que pudieran llevar un aumento en la frecuencia de adquisición de ITS. Probablemente, el tipo de cribado varíe según la prevalencia de las distintas infecciones en los diferentes medios y según el tipo de prácticas sexuales que los adolescentes lleven a cabo. La recomendación es la de realizarlo anualmente<sup>1</sup>.

Explicación de términos. Cribado de las ITS: realización de pruebas diagnósticas específicas para la sífilis, gonorrea, infección por *Chlamydomphila trachomatis* y virus herpes simple.

#### **57-Monitorización de las concentraciones plasmáticas de antirretrovirales**

**(MCP-ARV):** La maduración progresiva que acontece en la infancia en los procesos de farmacocinética y farmacodinamia conlleva un alto riesgo de concentraciones plasmáticas de antirretrovirales subóptimas, por lo que la MCP-ARV es especialmente útil en la infancia. Debe realizarse en niños que inician un régimen TARGA (Nivel C), niños que experimentan un fracaso terapéutico (Nivel C), ante la existencia de posible toxicidad por alguno de los fármacos a monitorizar (Nivel C) y cuando existen posibles interacciones medicamentosas con repercusión clínica (Nivel C).

Explicación de términos. Concentraciones plasmáticas de antirretrovirales: determinación analítica de las concentraciones mínimas de los fármacos en plasma.

#### **58-Evaluación del crecimiento y desarrollo en niños y adolescentes**

**infectados por el VIH:** Es muy importante en los niños y jóvenes infectados por VIH hacer un control analítico y seguimiento de los parámetros antropométricos en cada revisión. Si existen datos de malnutrición se solicitarán concentraciones plasmáticas de micronutrientes (Nivel C).

Explicación de términos. Control analítico: realizar pruebas analíticas que incluyan albúmina, glucemia y perfil lipídico, en ayunas. Parámetros antropométricos: peso, talla, índice de masa corporal y estadiaje de Tanner.

**59-Estudio de inmunoprotección frente a antígenos vacunales:** La inmunogenicidad frente a antígenos vacunales está poco estudiada en el niño



infectado por el VIH. Deberían realizarse títulos de anticuerpos frente a los antígenos vacunales administrados a partir de los 4-6 años cuando se completa el esquema de vacunación infantil. En el caso de niños mayores que recibieron las vacunas encontrándose sin TARV e inmunodeprimidos, se debería realizar un estudio de inmunogenicidad a los 4-6 años, 11-12 años y 14-16 años, antes de ser transferidos a la consulta de adultos (Nivel C).

Explicación de términos. Estudio de la inmunoprotección: determinación serológica frente a los antígenos vacunales recibidos según el calendario vacunal.

#### **Seguimiento de pacientes en tratamiento:**

##### **60-Traspaso coordinado de los adolescentes VIH a la unidad de adultos:**

El adolescente infectado por el VIH forma parte de un grupo que requiere una atención coordinada, no solo por lo que a su enfermedad se refiere, sino también por los cambios adaptativos pertinentes a esta etapa de la vida.

Por tal motivo, el traspaso a la unidad de adultos se debe realizar de forma programada y en la mejor situación no solo clínica-inmunológica, sino también psicológica, por lo que el manejo debe ser multidisciplinario con los equipos de Psicología, Enfermería, Trabajo social, Farmacia y médicos de las unidades pediátricas y de adultos. Asimismo, se debe integrar en dicha decisión al entorno social en el cual se encuentre el adolescente (Nivel C).

Explicación de términos. Traspaso coordinado unidad de adultos: constancia escrita de las acciones realizadas entre los diferentes agentes implicados en la atención del adolescente VIH, en el momento del cambio del seguimiento del paciente por parte del pediatra especialista al médico infectólogo de adultos.

**61-Valoración neuropsicológica de los pacientes VIH en seguimiento:** Es importante hacer un diagnóstico neurocognitivo de las diferentes funciones, especialmente en los niños que presentan dificultades escolares, para poder intervenir y mejorar este rendimiento (Nivel C).

Explicación de términos. Valoración neuropsicológica: realización clínica por parte de personal experimentado con especial atención a la presencia de retraso psicomotor, alteraciones perceptivas, sensoriales, cognitivas y de procesos de pensamiento, trastornos de lenguaje y comunicación, alteraciones de las formas de relación y comportamiento, de las funciones básicas y alteraciones profundas del desarrollo psíquico.

## **VARIABLES EXCLUIDAS EN LA POBLACIÓN PEDIÁTRICA Y JUSTIFICACIÓN DE LA EXCLUSIÓN**

### **Diagnóstico y evaluación inicial.**

#### **1-Derivación a un centro de reproducción asistida (indicador 5 GESIDA):**

En la población pediátrica no se evalúa la necesidad de derivación a un centro de reproducción asistida, ya que no se atienden parejas que planteen esta temática. De todos modos, en caso de encontrarse con alguna pareja adolescente en esta situación deberían cumplirse los estándares de las Unidades de adultos.

#### **2-Diagnóstico de VIH con serología previa negativa (viraje serológico)**

**(indicador 8 GESIDA):** Dado que el mecanismo de transmisión más frecuente en pediatría es madre-hijo (vertical), esta variable se excluye en esta población. De todas formas, la constancia de serología VIH previa es fundamental en embarazadas, debiendo realizarse en el primer control y en el tercer trimestre.

Igualmente se debe realizar serología VIH a adolescentes que mantengan conductas de riesgo, medida que debe llevarse a cabo por el personal de AP.

**3 y 4-Contenidos relevantes y pruebas complementarias en la valoración inicial asistida (indicadores 7 y 9 GESIDA respectivamente):** Corresponde a 2 de los indicadores elaborados según las guías de CEVIHP/ SEIP/ AEP/ SPNS).

### **Seguimiento e intervenciones orientadas a la prevención.**

**5-Cribado de ansiedad/depresión (indicador 19 GESIDA):** En nuestra unidad VIH pediátrica, el seguimiento de las intervenciones orientadas a detectar signos tempranos de ansiedad/depresión, se realiza por parte de psicología a la población de adolescentes. Creemos necesario la evaluación de la misma a través de tests elaborados a tal fin (ver apartado de nuevos indicadores elaborados a partir de las guías pediátricas).

Este indicador se excluye de la población pediátrica, dado que se abarca en un solo indicador adaptado a estas edades. Ver en tablas indicador número 61- Valoración neuropsicológica de los pacientes VIH en seguimiento.

**6-Realización de electrocardiograma (ECG) en pacientes en tratamiento con metadona (indicador 27 GESIDA):** En la población pediátrica no se asiste a pacientes farmacodependientes a opiáceos, tales como la heroína, por lo que esta variable es exclusiva de análisis en la población adulta, en quienes estaría indicado el tratamiento de desintoxicación de farmacodependientes.

**7-Cribado de sífilis (indicador 29 GESIDA):** Consideramos dicho indicador dentro del seguimiento de medidas de prevención de riesgos (ver en tablas indicador número 22).

### **Aspectos específicos en la mujer (VIH en la mujer).**

**8 y 9-TARV en la gestante infectada por el VIH y cesáreas en pacientes VIH (indicadores 45 y 46 GESIDA respectivamente):** No corresponde a la Unidad de Pediatría. En caso de adolescentes gestantes, se derivan a las unidades de adultos incluso aunque sean menores de 18 años.

### **Comorbilidades.**

**10 y 11-Abstinencia de alcohol en el paciente con hepatitis crónica de origen viral, evaluación por escalas de Child y/o MELD de la hepatopatía crónica avanzada (indicadores 48 y 49 GESIDA respectivamente):** En pediatría, en general, no se asiste a pacientes con hepatopatía crónica, por lo que no representan variables para ser analizadas.

**12-Evaluación para trasplante hepático en pacientes cirróticos (indicador 51 GESIDA):** Poco frecuente en pediatría, por lo no se incluye en la valoración.

**13 y 14-Tratamiento específico de la hepatitis crónica por VHC y respuesta viral sostenida tras el tratamiento de la hepatitis C (indicadores 52 y 53 GESIDA respectivamente):** No se realiza tratamiento de la hepatitis crónica en la coinfección por VIH y VHC en menores de 18 años de forma habitual.

**15-Valoración del riesgo cardiovascular al menos bienal (indicador 56 GESIDA):** Si bien es necesario un seguimiento cardiovascular en la población pediátrica, los parámetros estandarizados para su seguimiento corresponden a la edad adulta.
